# Supplementary material for: FOXN1 remodels chromatin access and schedules fitness during thymus ontogeny
Source: Research Square preprint supplement (doi:10.21203/rs.3.rs-8289212/v1), 2026-01-08
Supplement: Supplementary file 1 [file 13420526f10de9a18cffba87.xlsx]

## Sheet: Gene activity & expression
		E10.5 TEC-fated cells		E16.5 cTEC		E16.5 TP1-like cTEC		E16.5 TP3-like cTEC
	Gene	Gene activity score	Gene expression	Gene activity score	Gene expression	Gene activity score	Gene expression	Gene activity score	Gene expression
1	Foxn1	0.2364	0.00121498	0.745014	0.2426	0.751439	0.203867	0.809521	0.574345
2	1810037I17Rik	0.243219	0.132253	0.310168	0.219835	0.19993	0.29927	0.302927	0.464184
3	5031439G07Rik	0.490983	0.122728	0.527721	0.137593	0.492138	0.12232	0.559418	0.298965
4	AA467197	0.0767459	0.000607491	0.100862	0.0594373	0.087673	0.0407734	0.0811338	0.233115
5	Aamp	0.432229	0.17307	0.421336	0.191701	0.445764	0.163093	0.423852	0.472212
6	Abat	0.660296	0.141748	0.56019	0.337452	0.522313	0.0815467	0.637643	0.58877
7	Abca15	0.152033	0.000151873	0.30335	0.0126972	0.120718	0	0.425529	0.024321
8	Abhd6	0.297899	0.0699535	0.485685	0.292875	0.430176	0.39774	0.498138	0.526559
9	Abi2	0.492368	0.515557	0.476095	0.346885	0.687917	0.285414	0.434326	0.317107
10	Acat1	0.285056	0.100259	0.231214	0.164072	0.304553	0.105398	0.236418	0.341645
11	Ache	0.405117	0.00727847	0.546187	0.361509	0.601307	0.146171	0.627138	0.693903
12	Acot13	0.356078	0.0836992	0.387095	0.0772155	0.362741	0.105398	0.376184	0.133765
13	Acox1	0.360313	0.134033	0.350454	0.150094	0.261345	0.0407734	0.26362	0.230135
14	Actn3	0.357914	0.00364495	0.397195	0.130228	0.216002	0.0407734	0.400957	0.404514
15	Adamts2	0.96434	0.0898384	1.04643	0.186007	0.72264	0.186944	0.851376	0.184474
16	Adipor2	0.477634	0.200396	0.474111	0.176829	0.416639	0.12232	0.412913	0.212927
17	Adprhl2	0.285391	0.0788909	0.274879	0.0421551	0.395001	0.0407734	0.294876	0.121605
18	Agap1	1.74752	0.582648	1.55646	0.338524	1.52996	0.503137	1.32455	0.306078
19	Agpat3	0.505786	0.119854	0.798061	0.220334	0.763528	0.24464	0.893222	0.194568
20	Ahi1	0.646185	0.19566	0.5373	0.180018	0.500987	0	0.502155	0.313192
21	AI413582	0.313652	0.00820113	0.386117	0.0744987	0.401763	0.0815467	0.410252	0.233115
22	Ajap1	0.558888	0.0172132	0.610469	0.109213	0.182707	0	0.693496	0.308145
23	Akap12	0.641036	0.0932943	0.858183	1.38612	0.744001	0.679357	0.941171	1.96347
24	Alcam	0.637313	0.215096	1.09668	2.60406	1.16655	1.75159	1.05538	2.96515
25	Als2cl	0.341441	0.0033412	0.364385	0.0304207	0.233078	0	0.411753	0.0608024
26	Ank3	1.50582	0.828652	1.94229	2.73392	1.93198	2.07957	1.87361	2.87488
27	Ankmy1	0.223326	0.0355526	0.406824	0.0346476	0.296565	0	0.429272	0.109444
28	Ankrd44	1.08877	0.461281	1.04175	0.54424	0.932457	0.105398	1.20025	0.657047
29	Anxa7	0.313465	0.0888028	0.382802	0.197599	0.522578	0.163093	0.395199	0.378127
30	Ap1m1	0.397143	0.0972447	0.334536	0.0558698	0.440733	0	0.427558	0.104397
31	Ap3m2	0.343499	0.00774551	0.318004	0.00764525	0.236699	0	0.362772	0.0364814
32	Ap5b1	0.346076	0.000455618	0.414478	0.00367075	0.239239	0.0407734	0.443239	0.0364814
33	Apba1	0.776311	0.0207579	0.584321	0.134525	0.884939	0	0.596202	0.259503
34	Apba2	0.623592	0.0582878	0.868889	0.0969399	0.802674	0.170022	0.984231	0.135832
35	Arfgef2	0.503296	0.145257	0.539492	0.239558	0.522766	0.0407734	0.681094	0.413476
36	Arhgap8	0.368465	0.00577116	0.53085	0.274836	0.381937	0.186944	0.607816	0.358853
37	Arhgef10l	0.906034	0.0782834	1.08772	0.259089	1.16944	0.163093	1.10262	0.544977
38	Arhgef16	0.284351	0.00789738	0.587298	0.0909787	0.55636	0.186944	0.578442	0.233115
39	Arid1b	1.5838	0.966249	2.05069	1.62933	1.82816	1.22649	2.15177	2.0215
40	Asap2	0.847128	0.432401	1.09597	0.447154	0.93791	0.655506	1.12629	0.505713
41	Aste1	0.267835	0.0601446	0.305108	0.0414332	0.295258	0	0.278027	0.0851233
42	Atg16l2	0.457571	0.0860808	0.462957	0.0647072	0.328675	0	0.487521	0.121605
43	Atp2c1	0.560347	0.432065	0.522113	0.178697	0.194239	0.234646	0.46468	0.242077
44	Atp5g3	0.183121	0.391662	0.169775	0.232878	0.11247	0.292342	0.192125	0.368947
45	Atp5o	1.44546	0.49079	1.39751	0.188985	1.21519	0.203867	1.44503	0.312277
46	Atp6v0d1	0.465449	0.106549	0.460447	0.169871	0.629669	0.0407734	0.499583	0.257436
47	Atp6v1b2	0.283359	0.149839	0.329269	0.163321	0.349584	0.170022	0.367322	0.322372
48	Atp6v1h	0.264018	0.235179	0.350518	0.284391	0.289356	0.309264	0.367786	0.458203
49	Bach1	0.551391	0.31043	0.742039	0.596883	0.797742	0.769971	0.884691	0.745027
50	Bahd1	0.522319	0.0389568	0.695399	0.162507	0.521564	0.0407734	0.726098	0.358853
51	Bckdhb	0.688535	0.160605	0.674701	0.439179	0.474358	0.227718	0.720913	0.732649
52	Bcl10	0.479639	0.138104	0.502964	0.244327	0.496421	0.333115	0.491682	0.433664
53	Bcl7c	0.631169	0.254965	0.597629	0.140844	0.538462	0.210795	0.691059	0.288871
54	Bnip3l	0.517638	0.319704	0.663473	0.690107	0.500141	0.39774	0.768551	1.10485
55	Calcoco1	0.282045	0.0397162	0.51362	0.213043	0.425985	0.0815467	0.673376	0.419655
56	Calm1	0.396334	0.788009	0.395823	0.598156	0.392287	0.690082	0.431429	0.888392
57	Camk4	0.557772	0.0393358	0.838984	1.1307	0.70698	0.731599	0.839153	1.11604
58	Capn1	0.264007	0.00744176	0.286772	0.13398	0.33759	0	0.323714	0.286804
59	Casp7	0.414504	0.0398681	0.457471	0.0670972	0.480316	0.0407734	0.48205	0.109444
60	Cbx4	0.467196	0.117261	0.454705	0.177394	0.257944	0.105398	0.428659	0.308145
61	Ccdc34	0.487921	0.533419	0.618841	0.810596	0.473688	0.455435	0.481973	1.07779
62	Ccdc6	0.745441	0.166431	1.15012	0.36737	1.14602	0.414662	1.08429	0.636715
63	Ccl25	0.426185	0.136721	0.566665	0.914704	0.616605	0.275419	0.560304	1.85305
64	Ccnjl	0.571042	0.131411	0.593133	0.07827	0.510041	0.0407734	0.494175	0.104397
65	Cct8	0.286504	0.567465	0.259389	0.193263	0.130609	0.373889	0.328261	0.266616
66	Cd274	0.102191	0.000759364	0.441035	0.930777	0.189299	0.380817	0.569324	1.55246
67	Cd320	0.190231	0.0718417	0.17043	0.0330541	0.161339	0.0407734	0.176322	0.0851233
68	Cd83	0.218232	0.00601188	0.360995	0.196742	0.285931	0.0407734	0.420029	0.700024
69	Cdc42se2	0.553647	0.302351	0.75757	0.518672	0.758663	0.350038	0.885233	0.832845
70	Cdh4	1.34238	0.121802	2.02755	2.32331	1.37365	0.882478	2.13149	2.69535
71	Cds1	0.48498	0.0347074	0.829227	0.616352	0.603786	0.373889	0.833242	0.94395
72	Celf1	0.492617	0.9117	0.436071	0.609747	0.292053	0.455435	0.41416	0.552506
73	Cers3	0.289683	0.00455618	0.463922	0.0178897	0.438049	0	0.523118	0
74	Cetn3	0.375823	0.173093	0.37341	0.111468	0.159745	0.146171	0.426221	0.290937
75	Cfl2	0.341243	0.294301	0.311044	0.300738	0.221817	0.427788	0.432966	0.358853
76	Chchd6	0.559003	0.107667	0.741896	0.282596	0.41039	0.163093	0.891451	0.460269
77	Chd6	0.757493	0.930784	1.10059	1.56614	1.09699	1.23946	1.11194	1.64169
78	Chst11	1.061	0.119944	1.59064	0.85381	1.66413	0.649308	1.49073	0.909811
79	Chst8	0.920099	0.0590472	0.948112	0.188772	0.628188	0.0407734	1.08647	0.363406
80	Chsy3	0.559637	0.132456	0.516174	0.433422	0.416087	0.146171	0.508998	0.453872
81	Cib1	0.396233	0.0300594	0.402333	0.0732723	0.238342	0.309264	0.554084	0.201681
82	Cisd3	0.147752	0.0171244	0.14109	0.0569815	0.0910778	0	0.144524	0.208794
83	Clcn5	0.492175	0.439659	0.50967	0.320087	0.52294	0.257766	0.557884	0.283824
84	Cln5	0.311016	0.0346672	0.25756	0.0274463	0.217485	0	0.342254	0.0364814
85	Cobll1	0.583545	0.104605	0.999382	0.591909	1.04396	0.387015	1.13147	0.717726
86	Cpt1a	0.545198	0.0563736	0.656415	0.215845	0.693281	0.105398	0.730338	0.469013
87	Crebl2	0.405816	0.0218324	0.517855	0.0459434	0.356681	0.0407734	0.652614	0.0750292
88	Creg2	0.2417	0.00106311	0.318168	0.00539297	0.425257	0	0.278507	0
89	Cstb	0.150748	0.0552963	0.25245	0.761823	0.143677	0.557037	0.322783	1.66658
90	Ctf1	0.310628	0.0092012	0.320119	0.0212795	0.195582	0	0.444344	0.0121605
91	Cth	0.250103	0.0494246	0.327658	0.136136	0.324174	0.146171	0.408109	0.269597
92	Cuedc1	1.07413	0.146381	1.23006	0.206145	1.10396	0.268491	1.22591	0.400381
93	Cxcl12	0.33669	0.213367	0.41846	0.540672	0.315781	0.186944	0.448672	1.15134
94	Cxxc5	0.830869	0.207793	0.788058	0.304294	0.696869	0.186944	0.885772	0.61011
95	Cys1	0.215434	0.00288558	0.161942	0.00312629	0.100687	0	0.167024	0
96	Cyth1	0.898485	0.174563	1.16292	0.381952	0.904599	0.0815467	1.33562	0.587637
97	D5Ertd579e	0.508192	0.319739	0.801548	0.2836	0.861927	0.309264	0.88611	0.332466
98	Dbndd2	0.175164	0.0151242	0.2205	0.024787	0.205354	0	0.214717	0.0486419
99	Dcbld2	0.552416	0.370785	0.709925	0.182593	0.641029	0.105398	0.821898	0.208794
100	Dhrs11	0.228721	0.0271969	0.251321	0.0217495	0.340113	0	0.340775	0.0364814
101	Dhx29	0.359274	0.136348	0.502882	0.319622	0.46138	0.170022	0.56704	0.519006
102	Dll4	0.22007	0.00227809	0.524693	0.0812903	0.405005	0.0407734	0.70191	0.228068
103	Dlst	0.274395	0.321141	0.222286	0.135117	0.177266	0.0407734	0.220925	0.17736
104	Dnah9	0.605671	0.00786016	0.880244	0.361497	0.688371	0	0.821941	0.502732
105	Dph5	0.231188	0.0571702	0.321543	0.184467	0.197646	0.12232	0.288609	0.312915
106	Dpy19l3	0.487013	0.135674	0.928796	0.129407	1.0052	0.146171	0.805812	0.145926
107	Dtx4	0.38138	0.020821	0.585673	0.0684355	0.603981	0	0.647615	0.0972838
108	Dusp16	0.558833	0.564751	0.587312	0.580778	0.936265	0.54605	0.632223	0.753989
109	Dusp28	0.246537	0.00792319	0.246322	0.0354211	0.173382	0.0407734	0.301073	0.172313
110	Dynll2	0.33588	0.220773	0.314656	0.260302	0.428923	0.309264	0.312946	0.449023
111	Dynlt3	0.126845	0.0231993	0.157021	0.125967	0.274367	0.0407734	0.123343	0.313192
112	Ednrb	0.170871	0.0189702	0.240787	0.182959	0.123612	0.0815467	0.244039	0.415246
113	Efr3a	0.330928	0.19506	0.60955	0.622162	0.48185	0.455435	0.641963	0.739268
114	Egln2	0.467404	0.108283	0.496527	0.0564629	0.335723	0.105398	0.518762	0.109444
115	Eif2b4	0.346274	0.117066	0.356937	0.0891016	0.351682	0.163093	0.307926	0.27671
116	Enc1	0.424932	0.086124	0.521231	0.175881	0.384318	0.0815467	0.412144	0.167266
117	Endou	0.138561	0.00136685	0.277986	0.0083932	0.16688	0.0407734	0.263825	0.0121605
118	Enpp4	0.232349	0.0204026	0.283963	0.158238	0.215937	0.186944	0.205267	0.395334
119	Entpd6	0.289116	0.0436649	0.333582	0.0743243	0.170112	0.105398	0.39551	0.121605
120	Etfa	0.367752	0.168723	0.480737	0.483867	0.448947	0.455435	0.570933	0.723687
121	Exoc3l4	0.399536	0.00410056	0.544852	0.163326	0.532488	0.0407734	0.606905	0.344626
122	Exoc7	0.266525	0.0737645	0.242016	0.177104	0.105226	0.0407734	0.329476	0.399249
123	Eya2	0.873625	0.0855607	1.3031	0.980962	1.36064	0.888495	1.34744	1.15511
124	Ezr	0.556554	0.0821837	0.794526	0.27544	1.05354	0.268491	0.776612	0.460269
125	Fabp5	0.269004	0.322479	0.248216	1.02832	0.219657	1.35665	0.255483	1.51701
126	Faf1	0.750949	0.608914	1.03263	0.801053	0.886979	0.760903	1.04445	0.900157
127	Fam49b	0.852325	0.354576	1.18635	1.89636	1.2537	1.0419	1.241	2.11231
128	Fasn	0.667513	0.226366	0.619542	0.130088	0.554771	0.0407734	0.712621	0.332466
129	Fbxo6	0.227625	0.0064675	0.255069	0.0129122	0.206474	0	0.156129	0.0729629
130	Fbxw7	0.768556	0.420593	0.981421	1.07116	1.00247	0.631655	1.00201	1.35464
131	Fkbp1a	0.333802	0.339315	0.371867	0.320771	0.199378	0.309264	0.448157	0.443062
132	Fkbp5	0.813782	0.245777	1.06952	0.512058	0.904591	0.203867	1.10367	0.900853
133	Flot1	0.4317	0.0445647	0.435755	0.0569503	0.796651	0	0.473043	0.160153
134	Fmnl3	0.728665	0.204833	0.666494	0.170918	0.731306	0.186944	0.597279	0.189521
135	Frmd6	0.782068	0.512404	0.798193	0.404148	1.02905	0.684963	0.724886	0.317107
136	Fth1	0.302415	0.656686	0.267775	1.03261	0.261655	0.947848	0.304628	1.72934
137	Fzd5	0.531994	0.0167834	0.575028	0.0645871	0.384488	0	0.679808	0.0851233
138	Gale	0.266082	0.0170097	0.24896	0.00993773	0.302577	0	0.272816	0.0364814
139	Galnt10	0.8997	0.129677	0.645374	0.132095	0.785465	0.170022	0.535289	0.153039
140	Gars	0.327232	0.259654	0.244685	0.0858917	0.198793	0.0815467	0.299572	0.170247
141	Gas2l1	0.605264	0.0501582	0.635951	0.0611456	0.736681	0	0.650127	0.0729629
142	Gcat	0.436699	0.0659674	0.413183	0.102009	0.62316	0.12232	0.562805	0.252389
143	Gck	0.299502	0.00273371	0.295946	0.0296844	0.318357	0	0.171609	0.0608024
144	Gga3	0.3911	0.0825215	0.386425	0.058741	0.364534	0	0.34949	0.0972838
145	Gltp	0.334089	0.0365785	0.409797	0.0825909	0.367512	0.186944	0.442941	0.213842
146	Gmfg	0.54453	0.00661937	0.498808	0.0147604	0.480733	0	0.59303	0.024321
147	Gnb4	0.35977	0.105389	0.385293	0.131715	0.339696	0.105398	0.394055	0.240229
148	Golga4	0.361423	0.426626	0.552378	0.41321	0.567859	0.414662	0.581478	0.531166
149	Gosr2	0.310841	0.101967	0.331928	0.0644379	0.23365	0.203867	0.38722	0.0608024
150	Gpr146	0.326279	0.00758222	0.368037	0.0246867	0.238557	0	0.394481	0.0608024
151	Gpr63	0.286893	0.00661937	0.267785	0.00439289	0.175567	0	0.326101	0
152	Gpx4	0.443714	0.437187	0.446801	0.352337	0.355609	0.438513	0.452164	0.508693
153	Gramd1b	1.01805	0.121068	1.03474	0.0938186	0.941548	0.227718	0.743062	0.0800763
154	Grk5	0.694745	0.215748	0.935536	1.06155	0.76898	1.11334	0.880001	0.911853
155	Gse1	2.32806	0.726426	1.79034	0.1841	1.92916	0.186944	1.7297	0.153039
156	Gtf2e2	0.454658	0.22378	0.459027	0.250621	0.416363	0.257766	0.547857	0.48942
157	Hagh	0.449057	0.0345525	0.448386	0.0313949	0.483052	0.0407734	0.552695	0.109444
158	Hebp1	0.315332	0.0180845	0.303468	0.0821613	0.369245	0	0.292394	0.271663
159	Hes6	0.402179	0.0480551	0.443748	0.268236	0.487862	0.163093	0.387591	0.563534
160	Hexb	0.24634	1.07485	0.437013	1.74621	0.290486	1.68653	0.526303	1.97417
161	Hey1	0.500208	0.0420975	0.485175	0.0794532	0.208246	0	0.49074	0.133765
162	Hhip	0.531911	0.0719795	0.396627	0.201428	0.191145	0.163093	0.399461	0.288871
163	Hint1	0.257227	0.74203	0.283354	0.290896	0.204675	0.36696	0.307524	0.421504
164	Hipk3	0.564286	0.289306	0.669644	0.677558	0.559739	0.444711	0.773808	0.969703
165	Hmg20b	0.45235	0.241632	0.462023	0.329265	0.639629	0.268491	0.593091	0.525703
166	Hmgcr	0.372194	0.352194	0.330639	0.148791	0.446117	0.0815467	0.380501	0.196634
167	Hs1bp3	0.371594	0.0199842	0.399902	0.0181763	0.338004	0.0407734	0.344048	0.0729629
168	Il34	0.33834	0.0313662	0.697958	0.0331777	0.543661	0.12232	0.684486	0.0557553
169	Il4ra	0.269123	0.00707499	0.502706	0.0843652	0.386298	0.186944	0.598591	0.0972838
170	Irf8	0.312238	0.00434128	0.570517	0.305075	0.548413	0.316193	0.583163	0.613309
171	Jph1	0.461254	0.124446	0.906297	0.769518	0.741272	0.496209	0.907248	0.976738
172	Kcnk2	0.468738	0.0477143	0.708136	0.401526	0.630896	0.316193	0.767024	0.596817
173	Kcnn3	0.761893	0.0167834	1.06832	0.287097	0.916379	0.356966	1.07509	0.513958
174	Kctd1	1.02353	0.426338	1.24321	1.02659	1.17868	0.563234	1.33406	1.13952
175	Kif26a	0.54036	0.0614231	0.433959	0.016709	0.671856	0	0.311996	0
176	Kif3b	0.249954	0.0952961	0.259128	0.0741178	0.445574	0.0407734	0.401045	0.1652
177	Klc2	0.400426	0.0897627	0.349848	0.0292201	0.470489	0.0815467	0.304205	0.0608024
178	Klf15	0.33043	0.00622678	0.346211	0.0280021	0.368075	0.0407734	0.302631	0.0608024
179	Klhdc7a	0.0615126	0	0.215004	0.0355213	0.180239	0	0.292678	0.106464
180	Klhl8	0.343868	0.0200988	0.430845	0.0867071	0.54063	0.0407734	0.517038	0.128718
181	Kpna1	0.518203	0.424458	0.574915	0.405562	0.607721	0.468562	0.610135	0.489637
182	Kpna3	0.615421	0.471339	0.649219	0.302888	0.782139	0.363895	0.779884	0.406363
183	Kremen1	0.717637	0.111868	0.791057	0.177095	0.606314	0.12232	0.809029	0.313192
184	Lacc1	0.178868	0.032945	0.455559	0.247275	0.496564	0.163093	0.406978	0.266616
185	Lamtor4	0.220803	0.0754867	0.243523	0.0927068	0.316241	0.203867	0.296861	0.288871
186	Larp1b	0.599528	0.0983713	0.731189	0.847711	0.633714	0.659302	0.877478	1.0751
187	Lasp1	0.652126	0.131245	0.732039	0.227141	0.746167	0.186944	0.764504	0.301031
188	Ldlrap1	0.425071	0.0417536	0.574579	0.104725	0.558581	0.12232	0.563566	0.184474
189	Lgals12	0.130852	0.000607491	0.150869	0.00212622	0.125827	0	0.159399	0.0121605
190	Llgl2	0.391989	0.0126943	0.550235	0.041688	0.710957	0	0.548606	0.0557553
191	Lmx1a	0.768474	0.00427824	0.442725	0.0126972	0.521894	0	0.363577	0.024321
192	Lrrc24	0.515051	0.00288558	0.464399	0.00100008	0.485374	0	0.397657	0
193	Lrrc42	0.519921	0.101686	0.577048	0.0734475	0.440896	0.0815467	0.582929	0.116558
194	Lss	0.367825	0.0520065	0.290137	0.0160129	0.512766	0.0815467	0.323852	0.0121605
195	Ltbr	0.207878	0.0506138	0.274051	0.112144	0.225066	0.186944	0.31347	0.298051
196	Ly75	0.398507	0.037997	0.565631	0.883538	0.628898	0.0815467	0.647033	1.36467
197	Lypd6b	0.584621	0.0239731	0.938913	0.218497	1.08971	0.12232	0.885515	0.320305
198	Lypla1	0.296817	0.174766	0.281702	0.11389	0.254733	0.0646243	0.293934	0.228068
199	Mafa	0.389951	0.00197435	0.372616	0.0459921	0.254053	0	0.455415	0.153039
200	Man2a1	0.661295	0.295285	1.11673	1.14834	0.916306	0.871908	1.17583	1.17787
201	Map2k1	0.582143	0.164815	0.513023	0.156087	0.473522	0.0815467	0.421489	0.226002
202	Map2k3	0.39903	0.14473	0.397078	0.133389	0.398957	0.129249	0.368651	0.281757
203	Map3k14	0.624588	0.0942876	0.994431	0.377727	1.03074	0.309264	1.09908	0.59177
204	Mblac2	0.373909	0.0187062	0.345532	0.0630961	0.441763	0	0.363833	0.0729629
205	Mbnl3	0.330368	0.353638	0.293427	0.241189	0.434055	0.155239	0.303027	0.376995
206	Mccc1	0.27569	0.0915738	0.29366	0.156214	0.329767	0.12232	0.358347	0.309993
207	Mcfd2	0.227537	0.0695607	0.279206	0.0691058	0.156989	0.163093	0.169588	0.0972838
208	Mcur1	0.372377	0.0733461	0.314019	0.0419516	0.324721	0.0407734	0.264819	0.123671
209	Mdh1	0.352789	0.245982	0.466463	0.157836	0.500519	0.105398	0.42193	0.26455
210	Med13l	1.09603	0.702121	1.47089	0.689942	1.48596	0.590882	1.49387	0.713375
211	Metap1	0.452343	0.206999	0.527482	0.105003	0.481275	0.146171	0.532687	0.218889
212	Mfsd12	0.343083	0.0135425	0.408881	0.147216	0.339267	0.0407734	0.360827	0.46325
213	Mien1	0.168049	0.0520581	0.169106	0.0453444	0.143366	0.12232	0.184069	0.0972838
214	Mpc1	0.365245	0.0945139	0.342418	0.132108	0.392905	0.210795	0.31547	0.303098
215	Mras	0.391454	0.0839801	0.484458	0.115308	0.431588	0.105398	0.334895	0.189521
216	Mreg	0.395944	0.0232137	1.13702	0.889849	1.07791	0.690082	1.27787	1.23114
217	Mrgpre	0.189271	0.00258184	0.142882	0.000759364	0.199785	0	0.0731263	0
218	Mrpl38	0.306054	0.14297	0.321423	0.0768312	0.454056	0.0815467	0.309713	0.0800763
219	Mrps7	0.336517	0.168534	0.33429	0.0912196	0.31753	0	0.300356	0.203747
220	Msrb3	1.00576	0.317572	0.878411	0.42341	0.588683	0.290685	0.820753	0.425858
221	Mtch2	0.348283	0.221145	0.3096	0.103988	0.347243	0.105398	0.371335	0.262483
222	Mvk	0.377365	0.0435502	0.360174	0.0124307	0.561789	0	0.348385	0.024321
223	N4bp2l1	0.265316	0.033415	0.482644	0.161286	0.505267	0.12232	0.442013	0.238162
224	Nadk	0.596721	0.179103	0.603255	0.113855	0.369631	0.12232	0.781393	0.240229
225	Nampt	0.514341	0.171339	0.577066	0.361588	0.527333	0.481688	0.639351	0.628252
226	Napg	0.216519	0.123791	0.224681	0.120835	0.09086	0.0815467	0.214607	0.196634
227	Ndrg3	0.38118	0.0789058	0.686075	0.812165	0.510189	0.227718	0.863044	1.5205
228	Ndufa11	0.478522	0.226352	0.553165	0.449104	0.386589	0.52006	0.557633	0.860733
229	Ndufs5	0.14339	0.316676	0.139049	0.164859	0.0809476	0.163093	0.128208	0.438929
230	Nefm	0.464837	0.0214401	0.484028	0.212084	0.412097	0.12232	0.447736	0.450175
231	Nfkb2	0.463224	0.0461837	0.633076	0.360999	0.558838	0.42159	0.600147	0.558705
232	Nin	0.579968	0.181326	0.750524	0.402412	0.668349	0.186944	0.783104	0.58259
233	Nmi	0.175936	0.0109606	0.192061	0.097091	0.156927	0.234646	0.111205	0.247342
234	Noc2l	0.380452	0.187295	0.342722	0.140195	0.345608	0.251569	0.508328	0.344626
235	Nomo1	0.370145	0.0929893	0.433147	0.0832875	0.41188	0.105398	0.463652	0.17736
236	Nphp1	0.24931	0.0736243	0.334034	0.0532333	0.349071	0.0815467	0.324651	0.109444
237	Npl	0.24391	0.00745343	0.523532	0.109324	0.328161	0	0.5267	0.172313
238	Npnt	0.442161	0.120729	0.435858	0.285125	0.558807	0.210795	0.452173	0.534665
239	Nrcam	0.624603	0.0322633	0.762317	0.198394	0.430228	0.0407734	0.767092	0.271663
240	Nsmaf	0.412563	0.198434	0.486963	0.348658	0.458946	0.146171	0.607692	0.610328
241	Nuak1	0.841814	0.230212	0.974802	0.127733	0.89539	0.24464	0.969234	0.128718
242	Nudt19	0.31741	0.0350712	0.203305	0.0227094	0.162082	0	0.160177	0.0364814
243	Nudt3	0.517628	0.24885	0.596401	0.168305	0.340403	0.12232	0.69024	0.218889
244	Optn	0.391626	0.0517057	0.325423	0.0523588	0.202201	0.0407734	0.405794	0.024321
245	Osbpl10	0.897278	0.0890838	1.27026	0.758462	1.22745	0.316193	1.11128	1.14374
246	Oxct1	0.551147	0.425111	0.45802	0.308997	0.722857	0.356966	0.570839	0.355654
247	P4ha3	0.313868	0.0315409	0.354456	0.156527	0.514279	0.0646243	0.376766	0.26455
248	Pacsin2	0.577373	0.155573	0.73182	0.184355	0.638641	0.285414	0.768529	0.269597
249	Pard6b	0.4941	0.0102901	0.572571	0.00784874	0.705686	0	0.594127	0.024321
250	Pcbd2	0.686548	0.0937402	0.310588	0.0870528	0.426499	0.0815467	0.25659	0.121605
251	Pcbp3	0.832394	0.229641	0.924259	0.213943	0.820072	0.0815467	0.93315	0.381108
252	Pccb	0.395324	0.0632825	0.415256	0.078846	0.474445	0.0407734	0.525812	0.111511
253	Pdlim1	0.363143	0.0707101	0.877414	0.672333	0.818553	1.02847	0.904545	1.00348
254	Pds5b	0.598414	0.935756	0.821302	1.87639	0.459269	0.977896	0.967231	2.35106
255	Pdzrn3	1.22708	1.03948	0.852609	0.677246	0.67622	0.333115	0.993422	0.932151
256	Penk	0.176432	0.0125682	0.198831	0.0585662	0.185764	0	0.250563	0.128718
257	Pepd	0.794067	0.104308	0.70178	0.252733	0.529628	0.146171	0.821128	0.408429
258	Pithd1	0.285315	0.0846134	0.396883	0.300232	0.456553	0.0815467	0.367697	0.790253
259	Pitpnb	0.503981	0.252246	0.572779	0.217979	0.487198	0.234646	0.536801	0.271663
260	Pitrm1	0.375007	0.21351	0.550053	0.271227	0.356767	0.316193	0.599887	0.283824
261	Pkhd1l1	0.223866	0.03267	0.22172	0.517156	0.0667385	0.0815467	0.307362	0.861387
262	Pkig	0.468783	0.3291	0.439248	0.0919417	0.441651	0	0.358944	0.133765
263	Plau	0.177341	0.00351888	0.21787	0.0203941	0.0773615	0	0.221886	0.0486419
264	Plekha7	1.04699	0.0678074	1.3836	0.603616	1.16113	0.268491	1.37188	0.793669
265	Plekhb1	0.237327	0.00182247	0.373176	0.0105452	0.377425	0	0.358467	0.024321
266	Plgrkt	0.278537	0.0310222	0.661047	0.646051	0.535782	0.39774	0.724618	1.02496
267	Pltp	0.268456	0.0169387	0.434706	0.622978	0.26374	0.614732	0.467584	0.996787
268	Pnpla8	0.524972	0.233761	0.564206	0.410534	0.446661	0.414662	0.629805	0.702565
269	Pnrc2	0.257054	0.180366	0.251411	0.26039	0.358551	0.163093	0.289218	0.561686
270	Polg2	0.30503	0.110293	0.372342	0.294998	0.476345	0.356966	0.391459	0.519722
271	Pomk	0.240028	0.0203137	0.211852	0.0229129	0.344203	0	0.239526	0.0486419
272	Ppp1r2	0.286772	0.270993	0.350119	0.441086	0.189716	0.414662	0.321466	0.504581
273	Ppp2r1b	0.499523	0.151243	0.720371	0.0731604	0.817451	0.0407734	0.569343	0.104397
274	Ppp4r4	0.486599	0.0547918	0.566241	0.0578444	0.574029	0.0407734	0.659918	0.0851233
275	Prss16	0.184797	0.00227809	0.288515	1.60234	0.303687	0.593752	0.310163	2.41229
276	Psat1	0.404421	0.125244	0.476908	0.0894686	0.51545	0.12232	0.527822	0.128718
277	Psd	0.541931	0.0162762	0.555068	0.018053	0.497962	0.0407734	0.517444	0.024321
278	Psma4	0.258545	0.343049	0.26302	0.206976	0.300297	0.105398	0.291416	0.474496
279	Psma7	0.387686	0.682886	0.318294	0.477254	0.29976	0.666231	0.3721	0.825602
280	Psmb10	0.21287	0.0260104	0.192809	0.401714	0.122323	0.350038	0.212646	1.08648
281	Psmb11	0.0381009	0.00485993	0.281033	0.406743	0.162825	0.227718	0.327136	1.12787
282	Psmb3	0.355611	0.275426	0.317114	0.121067	0.281672	0.0407734	0.295383	0.247342
283	Psmb4	0.141951	0.326234	0.213126	0.307119	0.0721749	0.292342	0.226425	0.666083
284	Psmb9	0.272996	0.000151873	0.352497	0.149832	0.498057	0.12232	0.313407	0.567647
285	Psmd14	0.379237	0.484489	0.342529	0.360758	0.363571	0.366034	0.445449	0.5626
286	Pstpip2	0.447797	0.0183796	0.863763	0.979856	0.824664	0.790952	0.92612	0.991605
287	Ptpn1	0.484925	0.205804	0.680821	0.291477	0.977195	0.227718	0.68216	0.353806
288	Rab11fip4	0.903863	0.068816	1.13429	0.519451	1.00628	0.340044	1.18447	0.797806
289	Rab3gap2	0.478376	0.136694	0.604218	0.142738	0.504611	0.0815467	0.518869	0.133765
290	Rai14	0.996075	0.649159	1.03482	0.558243	0.746353	0.373889	1.02993	0.511398
291	Ralb	0.456049	0.0840174	0.512617	0.152672	0.43502	0.186944	0.501391	0.215908
292	Rasgef1b	0.448282	0.113128	0.880052	0.572928	0.629665	0.292342	0.905495	0.80925
293	Rassf2	0.356661	0.0081639	0.422079	0.0232283	0.308182	0	0.397885	0.0364814
294	Raver2	0.442172	0.107753	0.800671	0.250875	0.617212	0.203867	0.806436	0.37606
295	Rbms1	1.16516	1.16322	1.4183	1.2854	1.36356	0.977896	1.48898	1.19388
296	Rcan1	0.775861	0.105589	0.907477	0.110221	0.815314	0.12232	0.900589	0.145926
297	Rd3	0.0722256	0.000151873	0.303221	0.0120756	0.273036	0	0.371681	0.0608024
298	Relb	0.593557	0.107576	0.700139	0.415226	1.00512	0.380817	0.727444	0.533232
299	Rhbdl3	0.502802	0.0255176	0.559402	0.456705	0.551433	0.455435	0.58491	0.578676
300	Rhoq	0.630517	0.322655	0.638084	0.29193	0.623009	0.292342	0.604995	0.310211
301	Rmdn3	0.271052	0.0976346	0.20256	0.0256469	0.148784	0.0407734	0.196474	0.0608024
302	Rnf183	0.0556154	0.000607491	0.0542443	0.00106311	0.108764	0	0.0622978	0
303	Rnpepl1	0.31318	0.0634485	0.282038	0.149167	0.156043	0.0407734	0.348572	0.470364
304	Rps6ka3	0.49162	0.965717	0.494372	0.963814	0.40054	0.846247	0.497856	0.820773
305	S100a13	0.151446	0.0162504	0.21033	0.0438917	0.126407	0	0.228094	0.0729629
306	Samd1	0.489427	0.133712	0.418296	0.0438257	0.392314	0.0407734	0.566645	0.145926
307	Samd14	0.303938	0.114206	0.351693	0.122907	0.189848	0.105398	0.371878	0.206728
308	Scn4b	0.252303	0.000911236	0.296692	0.0332405	0.175469	0	0.384729	0.0851233
309	Scnn1a	0.235087	0.0064675	0.47737	0.0869982	0.279947	0	0.448083	0.235182
310	Sdhb	0.37332	0.225498	0.289658	0.0937987	0.350153	0.333115	0.289889	0.226002
311	Sgpl1	0.543829	0.191015	0.511658	0.758481	0.388387	0.438513	0.589777	1.17858
312	Sh2d4b	0.219595	0.0405389	0.675198	1.08682	0.531421	0.683153	0.611727	1.42692
313	Shc4	0.591835	0.0224027	0.599092	0.0236351	0.481301	0.0407734	0.498021	0.024321
314	Sipa1l2	0.359079	0.207504	0.646354	0.201159	0.631235	0.24464	0.731741	0.203747
315	Slain2	0.636031	0.302045	0.627006	0.214057	0.483254	0.186944	0.646106	0.240229
316	Slc11a2	0.455359	0.0908489	0.696185	0.157498	0.638215	0.146171	0.71242	0.153039
317	Slc16a6	0.369141	0.0396906	0.293052	0.0467745	0.360336	0.234646	0.310025	0.0486419
318	Slc22a23	0.656453	0.0498321	1.31258	0.480486	1.33591	0.683153	1.35034	0.687206
319	Slc25a22	0.248036	0.0211992	0.25678	0.0202939	0.422577	0.0407734	0.228272	0.0486419
320	Slc25a29	0.38387	0.0133648	0.454917	0.0143306	0.575789	0	0.402109	0.0851233
321	Slc25a33	0.384401	0.0695751	0.366656	0.0376478	0.320082	0.0646243	0.404783	0.0922368
322	Slc25a4	0.30897	0.534521	0.272244	0.365529	0.11856	0.427788	0.222257	0.706262
323	Slc2a13	0.79941	0.140068	1.07261	0.89531	0.839921	0.433986	1.08722	1.04311
324	Slc39a1	0.272594	0.0600299	0.270545	0.127755	0.318622	0.251569	0.291476	0.218889
325	Slc46a2	0.0921721	0.00197435	0.404394	0.439953	0.296288	0.227718	0.33641	0.885272
326	Slc5a6	0.492204	0.0131757	0.414964	0.00606349	0.265551	0	0.403646	0
327	Slc9a2	0.322365	0.00391147	0.449329	0.103777	0.330434	0.0407734	0.489225	0.155106
328	Smad1	0.574403	0.409587	0.74421	0.550361	0.842737	0.485484	0.73324	0.677037
329	Smap1	0.344021	0.3195	0.571005	0.654703	0.489177	0.492412	0.675728	0.985478
330	Snap47	0.310602	0.094915	0.456966	0.0934572	0.495864	0.0407734	0.491372	0.128718
331	Snap91	0.542228	0.0355156	0.638496	0.627245	0.588982	0.105398	0.674824	0.900631
332	Snn	0.439205	0.0564108	0.431376	0.139309	0.27735	0.146171	0.420734	0.301031
333	Snx16	0.211087	0.0784725	0.240602	0.163064	0.214681	0.105398	0.290598	0.288871
334	Snx25	0.538424	0.195058	0.444279	0.106568	0.323903	0.0407734	0.506664	0.109444
335	Snx3	0.456521	0.244271	0.545058	0.339286	0.477599	0.17622	0.673139	0.477477
336	Snx30	0.56332	0.119246	1.22319	0.536214	1.14209	0.0407734	1.21502	0.931847
337	Snx9	0.549097	0.228276	0.802631	0.304464	1.02701	0.251569	0.94323	0.562184
338	Sod2	0.370518	0.10636	0.322773	0.12317	0.375176	0.163093	0.414204	0.240229
339	Sowahb	0.204272	0.00288558	0.310591	0.00587439	0.209751	0	0.345265	0
340	Spats2	0.599596	0.505766	0.5291	0.459172	0.654876	0.356966	0.548139	0.643117
341	Spock2	0.384825	0.0103532	0.494796	0.304212	0.464809	0.105398	0.574712	0.409343
342	Sppl2a	0.344383	0.16919	0.3137	0.646801	0.217237	0.625457	0.351102	0.920406
343	Spryd3	0.376969	0.0265147	0.385461	0.0274577	0.526035	0	0.369712	0.0608024
344	Spryd7	0.434518	0.0401604	0.489095	0.247422	0.571026	0.0815467	0.521076	0.465317
345	Sqle	0.411214	0.220848	0.494374	0.0881767	0.50799	0.203867	0.604035	0.140879
346	Srebf1	0.642274	0.0530438	0.705187	0.104098	0.723187	0.0815467	0.679911	0.233115
347	Srebf2	0.736728	0.438362	0.777313	0.378045	0.817872	0.52006	0.690654	0.3639
348	Srp68	0.282787	0.163929	0.376782	0.1028	0.513054	0.268491	0.312104	0.153039
349	Srxn1	0.233506	0.0114163	0.327722	0.103958	0.365425	0.0407734	0.426808	0.191587
350	Stc2	0.268721	0.00868255	0.362692	0.0531909	0.321388	0	0.474096	0.172313
351	Stk40	0.575535	0.175199	0.571763	0.110637	0.638201	0.0815467	0.543266	0.196634
352	Stx11	0.26805	0.00883443	0.458747	0.289005	0.329477	0.526988	0.369469	0.433882
353	Stxbp1	0.528482	0.0759053	0.490992	0.0698336	0.315719	0.0815467	0.440237	0.1652
354	Syn3	1.33397	0.0847427	1.64521	0.188736	1.56017	0.0407734	1.53054	0.145926
355	Taok3	0.767861	0.0697557	0.849421	0.214599	0.746239	0.129249	0.89783	0.346692
356	Tap2	0.192657	0.000607491	0.276842	0.0479781	0.240168	0.0407734	0.264647	0.0851233
357	Tasp1	0.582739	0.23026	0.541149	0.251719	0.488882	0.251569	0.547462	0.303098
358	Tbata	0.106151	0	0.382082	0.916584	0.19491	0.186944	0.459983	1.94234
359	Tbc1d10a	0.419089	0.0398939	0.648244	0.102851	0.449472	0	0.85679	0.170247
360	Tex264	0.390295	0.0500063	0.544886	0.0702604	0.378338	0	0.522794	0.145926
361	Thyn1	0.263506	0.0923217	0.247795	0.0290568	0.333011	0.0815467	0.244869	0.0679158
362	Tjap1	0.474625	0.140689	0.639062	0.117211	0.706801	0.0815467	0.614051	0.201681
363	Tmbim6	0.423853	0.227421	0.585259	0.390129	0.519614	0.146171	0.759129	0.606195
364	Tmcc3	1.05494	0.046107	1.31024	0.216538	1.47337	0.0407734	1.33476	0.390287
365	Tmed5	0.424918	0.162545	0.4451	0.332504	0.352827	0.496209	0.481711	0.524987
366	Tmem184b	0.513473	0.122891	0.569896	0.0929277	0.661419	0.105398	0.568771	0.155106
367	Tmem229b	0.250703	0.00622678	0.317355	0.0244833	0.441568	0.0407734	0.348573	0.0364814
368	Tmie	0.274976	0.00106311	0.380612	0.0911764	0.318377	0	0.42926	0.242295
369	Tnrc6c	0.798188	0.907587	0.833755	0.843125	0.581067	0.590882	0.829695	0.93491
370	Trak2	0.53842	0.163546	0.49347	0.211013	0.310133	0.163093	0.453799	0.290719
371	Trib3	0.220389	0.00977147	0.202718	0.00933024	0.0862038	0.0407734	0.205662	0
372	Trpm2	0.250386	0.00358191	0.378374	0.263086	0.27775	0.0407734	0.271748	0.511892
373	Tspan14	0.70543	0.12523	0.96022	0.292736	0.96725	0.445441	0.895733	0.395334
374	Tspan18	0.819561	0.0631597	0.810561	0.132097	0.69069	0.0407734	0.872399	0.295984
375	Tubb2b	0.336723	0.133167	0.344199	0.113405	0.394864	0.105398	0.399383	0.203747
376	Tubb6	0.312391	0.075716	0.455599	0.320492	0.325764	0.513131	0.519232	0.431816
377	Tulp3	0.438647	0.149277	0.657857	0.413235	0.623264	0.105398	0.776981	0.620422
378	Txn1	0.503061	0.488355	0.562625	0.615094	0.690076	0.42159	0.688329	1.25325
379	Txnrd3	0.459703	0.0442724	0.566265	0.115712	0.466174	0.0646243	0.748738	0.269597
380	Ubn1	0.48973	0.456996	0.493931	0.583046	0.571272	0.584684	0.554799	0.665865
381	Uck2	0.641318	0.267361	0.9034	0.187571	0.771756	0.350038	0.904676	0.223659
382	Ugdh	0.524889	0.167417	0.584771	0.287138	0.348961	0.146171	0.622709	0.416457
383	Unc5b	0.97274	0.160643	0.837317	0.088844	0.743879	0	0.691282	0.0972838
384	Usp12	0.534583	0.220739	0.695724	0.186	0.718294	0.12232	0.780415	0.252389
385	Usp15	0.557505	0.482286	0.59977	0.395787	0.579068	0.268491	0.589248	0.564449
386	Usp35	0.465028	0.0169467	0.515693	0.159882	0.348619	0	0.545019	0.278777
387	Ust	0.883994	0.307058	1.37659	1.07076	1.34836	0.794748	1.52466	1.29703
388	Vapa	0.598758	0.551118	0.617304	0.400687	0.651913	0.309264	0.690988	0.426769
389	Vars	0.40224	0.190089	0.389532	0.310371	0.368428	0.203867	0.452966	0.496257
390	Vopp1	0.344957	0.159087	0.578376	0.237378	0.364473	0.12232	0.747697	0.322372
391	Vps13a	0.496922	0.215167	0.58316	1.02165	0.384713	0.649308	0.714668	1.18516
392	Wbp2	0.389521	0.0709677	0.353309	0.0639364	0.321032	0	0.351061	0.109444
393	Whrn	0.727815	0.292136	0.69953	0.163647	0.472897	0.24464	0.710322	0.26455
394	Wipf3	0.4685	0.024721	0.360841	0.0118979	0.443584	0	0.309662	0.0364814
395	Wipi1	0.671513	0.101005	0.744586	0.149761	0.785993	0	0.846579	0.301031
396	Wnt4	0.3331	0.0227323	0.708646	0.407175	0.63907	0.292342	0.605256	0.613807
397	Xrcc3	0.53102	0.0218066	0.545427	0.0102415	0.465071	0	0.669897	0.0121605
398	Yaf2	0.514639	0.593325	0.39939	0.185517	0.491386	0.227718	0.579798	0.25537
399	Ykt6	0.255212	0.139572	0.225658	0.0902907	0.198215	0.129249	0.20184	0.213842
400	Ypel5	0.546788	0.101285	0.633192	0.207811	0.585336	0.146171	0.690262	0.328991
401	Zar1	0.124349	0.00525251	0.0607522	0.0016706	0.0622182	0	0.10815	0
402	Zbtb18	0.545831	0.0833354	0.531837	0.0514967	0.643275	0.0815467	0.559138	0.121605
403	Zdhhc24	0.312047	0.00774551	0.368187	0.013938	0.277264	0	0.340848	0.0486419
404	Zfp142	0.452626	0.120229	0.492989	0.143918	0.310189	0.163093	0.540372	0.191587
405	Zfp318	0.483083	0.179374	0.522803	0.313421	0.316195	0.12232	0.53981	0.541062
406	Zfp319	0.448236	0.0460576	0.429075	0.0224315	0.459142	0	0.523177	0.0922368
407	Zfyve21	0.496632	0.033071	0.592559	0.0698907	0.447619	0	0.763302	0.128718
408	Zmpste24	0.183804	0.132153	0.180861	0.122517	0.131712	0.0946728	0.250056	0.213842
409	Znfx1	0.467112	0.0473356	0.573857	0.0463102	0.53499	0.0407734	0.562956	0.121605
410	Znrf2	0.573113	0.171796	0.881762	0.51555	0.794243	0.186944	0.908468	0.734419
