# Supplementary material for: FOXN1 remodels chromatin access and schedules fitness during thymus ontogeny
Source: Research Square preprint supplement (doi:10.21203/rs.3.rs-8289212/v1), 2026-01-08
Supplement: Supplementary file 2 [file 1d84cfaa17096e4b79a62282.xlsx]

## Sheet: TP1 and TP3 DEG for modules
TP1			TP3
	Gene			Gene
1	Krt19		1	Prss16
2	Gstm1		2	Cdh4
3	Krt5		3	Ndrg3
4	Cyb561		4	Psmb9
5	Rhov		5	Cd274
6	Irf6		6	Plgrkt
7	Prom2		7	Psmb11
8	Cd9		8	Ccl25
9	Krtdap		9	Actn3
10	Gstm7		10	Dhx29
11	Cd24a		11	Pithd1
12	Samd10		12	Calcoco1
13	Pcsk6		13	Dll4
14	Tagln2		14	Snx30
15	F11r		15	Psmb10
16	Ngfr		16	Ykt6
17	Fubp1		17	Bnip3l
18	Upk3bl		18	Fth1
19	Fstl1		19	Akap12
20	Gpr15lg		20	Penk
21	Lhfpl2		21	Hint1
22	Dkk3		22	Irf8
23	Tmc6		23	Nphp1
24	Cpm		24	Arhgef16
25	Epcam		25	Pds5b
26	Efhd1		26	Npl
27	Igfbp4		27	Slc46a2
28	Gpc3		28	Hes6
29	Pradc1		29	Osbpl10
30	Ctsz		30	Sh2d4b
31	Scarb1		31	Cd83
32	Il17re		32	Arid1b
33	Dusp6		33	Cxcl12
34	Tpm1		34	Exoc7
35	Creld1		35	Crip3
36	Sox9		36	Mfap4
37	Igsf9		37	Stat1
38	App		38	Edaradd
39	Spib		39	Ramp3
40	Pla2g7		40	Lancl1
41	Kcnj8		41	Serpina3g
42	Raph1		42	Ctsl
43	Rab25		43	Snx32
44	Tdrd1		44	Cdk20
45	Tecr		45	Fer1l6
46	Pdia6		46	Tmem131l
47	Nnat		47	Tsc22d1
48	Gne		48	Umodl1
49	Prxl2a		49	H2-Aa
50	Tmem132e		50	Tnc
51	Cdk2ap2		51	Pgam2
52	Emp1		52	Fn1
53	Plk2		53	Vwa5a
54	Insig1		54	Dnajc13
55	Srd5a1		55	Ada
56	Bzw2		56	Vcam1
57	Ndrg2		57	Ldhb
58	Adam11		58	Hgsnat
59	Aqp3		59	Foxo3
60	Prrx1		60	Kpna2
61	Tmem54		61	Ciita
62	Atp1b1		62	Fmo1
63	Ccnd2		63	Mmp9
64	Fxyd2		64	A630076J17Rik
65	Spry1		65	Slc22a7
66	Hacd3		66	Igfbp2
67	Kcnk1		67	Nat2
68	Cldn4		68	Cd74
69	Etv4		69	Pnpla7
70	Clu		70	Ppp1r27
71	Notch1		71	Lrrc20
72	Ccn1		72	Sulf1
73	Syngr2		73	Kctd10
74	Id2		74	Lrpap1
75	Gsn		75	Rgl3
76	Cyba		76	Pir
77	Gstm2		77	Prxl2b
78	Depp1		78	Papln
79	Rtl3		79	Faxc
80	Pmepa1		80	Gsdmd
81	Trpv4		81	Kbtbd6
82	Nrarp		82	Thbs2
83	Fam20c		83	Nrsn1
84	Klf10		84	Lrch1
85	Sncg		85	Ccdc8
86	1700001O22Rik		86	Fgf14
87	Tgif1		87	Gimap9
88	Ch25h		88	Cxcl10
89	Cldn7		89	Stard5
90	Nr1h3		90	Rnaseh2a
91	Krt75		91	Rsu1
92	Col4a6		92	H2-Eb1
93	Mycl		93	Stat4
94	Igfals		94	Cnn3
95	Lmna		95	Arpc2
96	Fbp2		96	Kcnip3
97	Fmo2		97	H2-Ab1
98	Sele		98	Clec11a
99	Tpd52		99	Dctn1
100	Ddr2		100	Oasl2
101	Slc38a1		101	Jak1
102	Hcar2		102	Sulf2
103	Pglyrp2		103	Map1lc3b
104	Myb		104	Fam72a
105	Fap		105	Scube2
106	Ano9		106	Naprt
107	Acsl5		107	Pgm5
108	Prrg3		108	Tha1
109	Id1		109	Nkain4
110	Bcl2l14		110	Slc25a42
			111	Trim26
			112	Ppp2r2b
			113	Gfap
			114	Septin4
			115	Irgm1
			116	Aldh1l1
			117	Cflar
			118	Pcx
			119	slowFT
			120	Bloc1s6
			121	Gmpr
			122	Fam91a1
			123	Tgtp2
			124	S1pr3
			125	Frmpd1
			126	Myo1c
			127	Gm5799
			128	1500009L16Rik
			129	Fig4
			130	Ankrd13b
			131	Prepl
			132	Gas6
			133	As3mt
			134	Tst
			135	Leo1
			136	Msc
			137	Ky
			138	Cyrib
			139	Spats2l
			140	Loxl3
			141	Rmnd5b
			142	Nrip2
			143	Glyctk
			144	Ets2
			145	Fzr1
			146	Fndc5
