# Supplementary material for: FOXN1 remodels chromatin access and schedules fitness during thymus ontogeny
Source: Research Square preprint supplement (doi:10.21203/rs.3.rs-8289212/v1), 2026-01-08
Supplement: Supplementary file 3 [file 29244a0f7d14fc48fb471a53.xlsx]

## Sheet: FOXN1targets E10.5 vs E16.5
TSS closed at E10.5 open at E16.5					Site upstream to TSS closed at E10.5 open at E16.5					Site in Gene body closed at E10.5 open at E16.5
	Gene					Gene					Gene
1	Abca15				1	Abhd6				1	5031439G07Rik
2	Arhgef10l				2	Als2cl				2	Abat
3	Atp6v1h				3	Calcoco1				3	Abhd6
4	Bahd1				4	Cd83				4	Actn3
5	Cers3				5	Cds1				5	Adamts2
6	Endou				6	Cers3				6	Agpat3
7	Gck				7	Cpt1a				7	AI413582
8	Gpr146				8	Cstb				8	Ajap1
9	Klhdc7a				9	Dbndd2				9	Akap12
10	Larp1b				10	Dph5				10	Alcam
11	Pithd1				11	Dusp28				11	Als2cl
12	Prss16				12	Ednrb				12	Ank3
13	Psmb10				13	Enpp4				13	Ankrd44
14	Psmb11				14	Exoc3l4				14	Apba1
15	Rd3				15	Hexb				15	Apba2
16	Rnf183				16	Il4ra				16	Arfgef2
17	Scnn1a				17	Kremen1				17	Arhgap8
18	Sh2d4b				18	Lacc1				18	Arhgef10l
19	Slc46a2				19	Ldlrap1				19	Arhgef16
					20	Ltbr				20	Arid1b
					21	Ly75				21	Asap2
					22	Mfsd12				22	Atp6v0d1
					23	N4bp2l1				23	Atp6v1b2
					24	Nfkb2				24	Atp6v1h
					25	Nsmaf				25	Bach1
					26	Pithd1				26	Bahd1
					27	Pkhd1l1				27	Bckdhb
					28	Plgrkt				28	Bcl10
					29	Rd3				29	Bnip3l
					30	Scnn1a				30	Calcoco1
					31	Sh2d4b				31	Camk4
					32	Snn				32	Casp7
					33	Sowahb				33	Ccdc34
					34	Sppl2a				34	Ccdc6
					35	Stx11				35	Ccl25
					36	Tap2				36	Cd274
					37	Tbata				37	Cd83
					38	Tmie				38	Cdc42se2
					39	Tspan14				39	Cdh4
					40	Tspan18				40	Cds1
					41	Tulp3				41	Cers3
					42	Txn1				42	Cfl2
										43	Chchd6
										44	Chd6
										45	Chst11
										46	Chst8
										47	Chsy3
										48	Cib1
										49	Cobll1
										50	Cpt1a
										51	Crebl2
										52	Creg2
										53	Ctf1
										54	Cuedc1
										55	Cxxc5
										56	Cys1
										57	Cyth1
										58	Dhx29
										59	Dll4
										60	Dnah9
										61	Dph5
										62	Dtx4
										63	Dusp16
										64	Dynlt3
										65	Ednrb
										66	Efr3a
										67	Enc1
										68	Endou
										69	Entpd6
										70	Etfa
										71	Exoc7
										72	Eya2
										73	Ezr
										74	Faf1
										75	Fam49b
										76	Fbxw7
										77	Fkbp5
										78	Galnt10
										79	Gck
										80	Gnb4
										81	Grk5
										82	Gtf2e2
										83	Hexb
										84	Hhip
										85	Hipk3
										86	Il34
										87	Il4ra
										88	Irf8
										89	Jph1
										90	Kcnk2
										91	Kcnn3
										92	Kctd1
										93	Klhdc7a
										94	Klhl8
										95	Lacc1
										96	Lasp1
										97	Ldlrap1
										98	Llgl2
										99	Lmx1a
										100	Ly75
										101	Lypd6b
										102	Man2a1
										103	Map3k14
										104	Mccc1
										105	Mras
										106	Mreg
										107	N4bp2l1
										108	Nampt
										109	Ndrg3
										110	Ndufa11
										111	Nefm
										112	Nin
										113	Nmi
										114	Npl
										115	Npnt
										116	Nrcam
										117	Nsmaf
										118	Osbpl10
										119	Pacsin2
										120	Pccb
										121	Pdlim1
										122	Pds5b
										123	Pepd
										124	Pithd1
										125	Pitrm1
										126	Pkhd1l1
										127	Plau
										128	Plekha7
										129	Plgrkt
										130	Pltp
										131	Pnpla8
										132	Pnrc2
										133	Ppp1r2
										134	Ppp4r4
										135	Prss16
										136	Psmb11
										137	Pstpip2
										138	Ptpn1
										139	Rab11fip4
										140	Rab3gap2
										141	Rasgef1b
										142	Rassf2
										143	Raver2
										144	Rbms1
										145	Rd3
										146	S100a13
										147	Scn4b
										148	Scnn1a
										149	Sgpl1
										150	Shc4
										151	Slc22a23
										152	Slc25a29
										153	Slc2a13
										154	Slc39a1
										155	Slc46a2
										156	Slc9a2
										157	Smad1
										158	Smap1
										159	Snap91
										160	Snn
										161	Snx30
										162	Snx9
										163	Sowahb
										164	Spock2
										165	Sppl2a
										166	Spryd3
										167	Spryd7
										168	Srebf1
										169	Stx11
										170	Syn3
										171	Taok3
										172	Tasp1
										173	Tbata
										174	Tbc1d10a
										175	Tex264
										176	Tmbim6
										177	Tmcc3
										178	Tmed5
										179	Tmem229b
										180	Tmie
										181	Tspan14
										182	Tspan18
										183	Tulp3
										184	Txn1
										185	Txnrd3
										186	Ubn1
										187	Ugdh
										188	Usp35
										189	Ust
										190	Vopp1
										191	Vps13a
										192	Wipi1
										193	Wnt4
										194	Ypel5
										195	Zfp142
										196	Zfp318
										197	Zfyve21
										198	Znrf2
